# Supplementary material for: Soybean chlorotic spot virus, a novel begomovirus infecting soybean in Brazil
Source: Springer Nature journal article supplement (doi:10.1007/s00705-012-1499-0), 2012-10-09
Supplement: MOESM1 [file 8648986]

Table S1. Begomoviruses used for sequence comparisons and phylogenetic analysis

| **Species found in North America** | | | |
| --- | --- | --- | --- |
| Species | Virus acronyms | GenBanK acession numbers | |
| **DNA-A** | **DNA-B** |
| *Bean calico mosaic vírus* | BCaMV | AF110189 | AF110190 |
| *Bean dwarf mosaic vírus* | BDMV | M88179 | M88180 |
| *Bean golden yellow mosaic virus* | BGYMV | AF173555 | AF173556 |
| *Cabbage leaf curl virus* | CabLCuV | U65529 | U65530 |
| *Chino del tomate virus* | CdTV | AF101476 | AF101478 |
| *Corchorus yellow spot virus* | CoYSV | DQ875868 | DQ875869 |
| *Cotton leaf crumple virus* | CLCrV | AF480940 | AF480941 |
| *Cucurbit leaf curl virus* | CuLCrV | AF224760 | AF224761 |
| *Macroptilium yellow mosaic Florida virus* | MacYMFV | AY044135 | AY044136 |
| *Okra yellow mosaic Mexico virus* | OYMMV | DQ022611 | GU972604 |
| *Pepper golden mosaic virus* | PepGMV | U57457 | AF499442 |
| Rhynchosia golden mosaic Yucatan virus | RhGMYuV | EU021216 | FJ792608 |
| *Sida golden mosaic virus* | SiGMV | AF049336 | AF039841 |
| *Sida golden mosaic Florida virus* | SiGMFV | HM003779 | HM003778 |
| *Sida golden mottle virus* | SiGMoV | GU997691 | GU997692 |
| *Sida yellow mosaic Yucatan virus* | SiYMYuV | DQ875872 | DQ875873 |
| *Squash leaf curl virus* | SLCuV | M38183 | M38182 |
| **Species found in Central America** | | | |
| Species | Virus acronyms | GenBanK acession numbers | |
| **DNA-A** | **DNA-B** |
| *Macroptilium yellow mosaic virus* | MaYMV | EF585289 | EF585289 |
| *Potato yellow mosaic Panama virus* | PYMPV | Y15034 | Y15033 |
| Potato yellow mosaic Trinidad virus | PYMTV | AF039031 | AF039032 |
| *Sida golden mosaic Costa Rica virus* | SiGMCRV | X99550 | X99551 |
| *Sida golden mosaic Honduras virus* | SiGMHV | Y11097 | Y11098 |
| *Sida yellow vein virus* | SiYVV | Y11099 | Y11100 |
| Tobacco yellow crinkle virus | TYCV | FJ213931 | HQ896204 |
| *Tomato leaf curl Sinaloa virus* | ToLCSiV | AJ608286 | AJ508783 |
| *Tomato mosaic Havana virus* | ToMHV | Y14874 | Y14875 |
| *Tomato mottle Taino virus* | ToMoTV | AF012300 | AF012301 |
| Wissadula golden mosaic St Thomas virus | WGMSTV | DQ395343 | EU158095 |
| **Species found in South America** | | | |
| Species | Virus acronyms | GenBanK acession numbers | |
| **DNA-A** | **DNA-B** |
| Abutilon Brazil virus | AbBV | FN434438 | FN434439 |
| *Bean golden mosaic virus* | BGMV | M88686 | M88687 |
| *Blainvillea yellow spot virus* | BIYSV | EU710756 | EU710757 |
| Cleome leaf crumple virus | ClLCrV | JF694461 | JF694460 |
| Macroptilium yellow net virus | MaYNV | JN418998 | JN418999 |
| Macroptilium yellow vein virus | MaYVV | JN419021 | n.a |
| Macroptilium yellow spot virus | MaYSV | JN419018 | n.a |
| Okra mottle virus | OMoV | EU914817 | EU914818 |
| Passionfruit severe leaf distortion virus | PSLDV | FJ972767 | FJ972768 |
| *Potato yellow mosaic virus* | PYMV | D00940 | D00941 |
| *Sida micrantha mosaic virus* | SiMMV | AJ557451 | AJ557453 |
| *Sida mosaic Alagoas virus* | SiMAV | JF694471 | JF694475 |
| *Sida mottle virus* | SiMoV | AY090555 | n.a |
| *Sida yellow mosaic virus* | SiYMV | AY090558 | n.a |
| Solanum mosaic Bolivia virus | SoMBoV | HM585435 | HM585436 |
| *Soybean blistering mosaic virus* | SbBMV | EF016486 | n.a |
| *Tomato chlorotic mottle virus* | ToCMoV | AF491306 | AF490004 |
| Tomato common mosaic virus | ToCmMV | EU710754 | EU710755 |
| *Tomato golden mosaic virus* | TGMV | K02029 | K02030 |
| Tomato interveinal chlorosis virus | ToICV | JF803252 | n.a |
| to mild mosaic virus | ToMlMV | EU710752 | EU710753 |
| *Tomato rugose mosaic virus* | ToRMV | AF291705 | AF291706 |
| Tomato severe mottle Argentina virus | TSMAV | JN564749 | JN564750 |
| *Tomato severe rugose virus* | ToSRV | DQ207749 | EF534708 |
| *Tomato yellow margin leaf curl virus* | TYMLCV | AY508993 | AY508994 |
| *Tomato yellow spot virus* | ToYSV | DQ336350 | DQ336351 |
| *Tomato yellow vein streak virus* | ToYVSV | EF417915 | EF417916 |
| **Species used as outgroups** | | | |
| Species | Virus acronyms | GenBanK acession numbers | |
| **DNA-A** | **DNA-B** |
| *Clerodendrum golden mosaic virus* | ClGMV |  | DQ641693 |
| *Tomato Leaf Curl New Delhi virus* | ToLCNDV | U15015 |  |

n.a: not available
